# Supplementary material for: The Individual and Combined Effects of the Cyanotoxins, Anatoxin-a and Microcystin-LR, on the Growth, Toxin Production, and Nitrogen Fixation of Prokaryotic and Eukaryotic Algae
Source: MDPI journal article supplement (doi:10.3390/toxins11010043), 2019-01-15
Supplement: s1 [file s1]

# Supplementary Materials: The Individual and Combined Effects of the Cyanotoxins, Anatoxin-a and Microcystin-LR, on the Growth, Toxin Production, and Nitrogen Fixation of Prokaryotic and Eukaryotic Algae

Mathias Ahii Chia, Benjamin J. Kramer, Jennifer G. Jankowiak, Maria do Carmo Bittencourt-Oliveira and Christopher J. Gobler

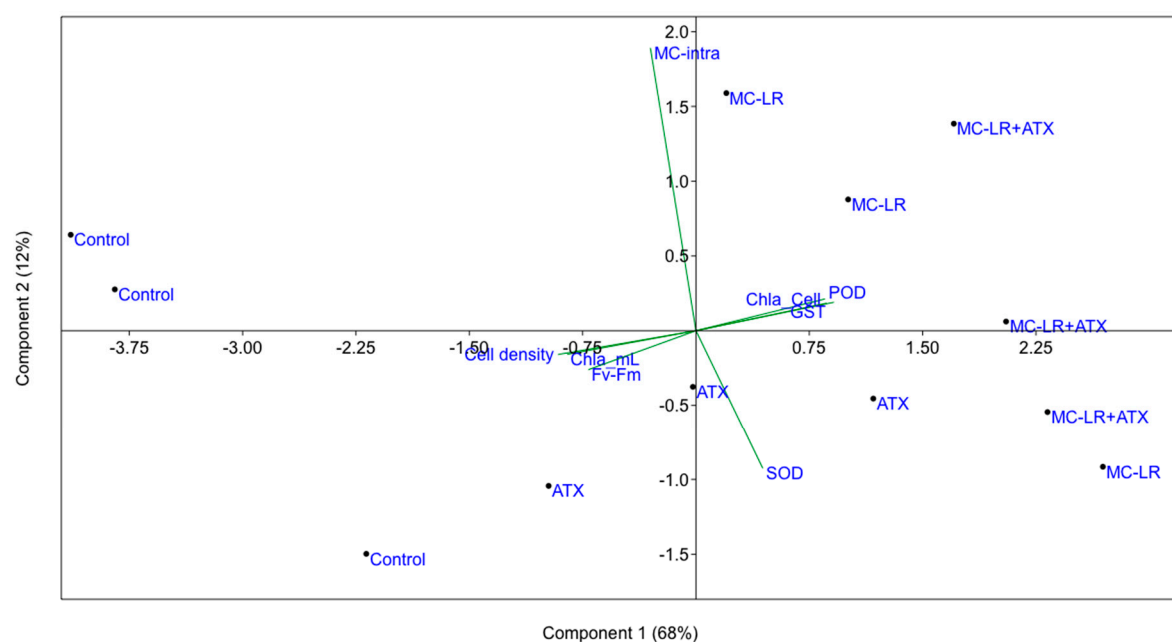

**Figure S1.** PCA biplot showing the relationship between the physiological responses of *Microcystis aeruginosa* LE-3 to different anatoxin-a (ATX) and microcystin-LR (MC-LR) treatments. SOD = Superoxide dismutase activity, POD = peroxidase activity, GST = Glutathione S-transferase activity, Chla-Cell = Chlorophyll content per cell, Chla-mL = Chlorophyll content per mL, Fv/Fm = maximum quantum efficiency of photosystem II.

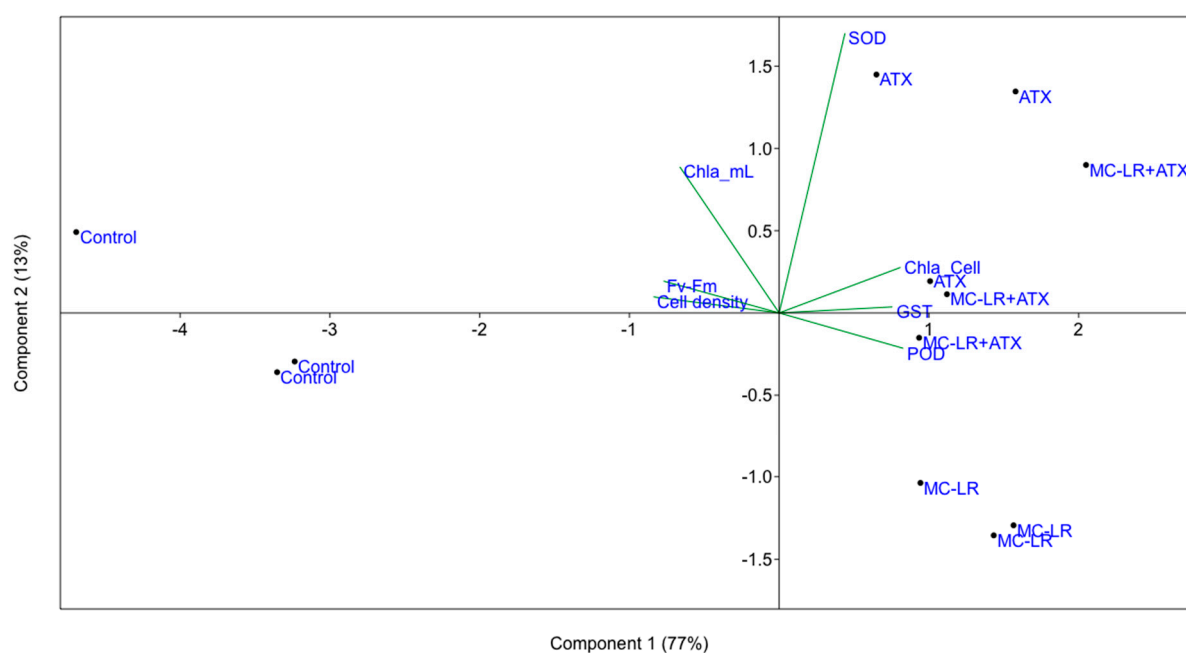

**Figure S2.** PCA biplot showing the relationship between the physiological responses of *Microcystis* sp. SR as a function of different anatoxin-a (ATX) and microcystin-LR (MC-LR) treatments. SOD = Superoxide dismutase activity, POD = peroxidase activity, GST = Glutathione S-transferase activity, Chla-Cell = Chlorophyll content per cell, Chla-mL = Chlorophyll content per mL, Fv/Fm = maximum quantum efficiency of photosystem II.

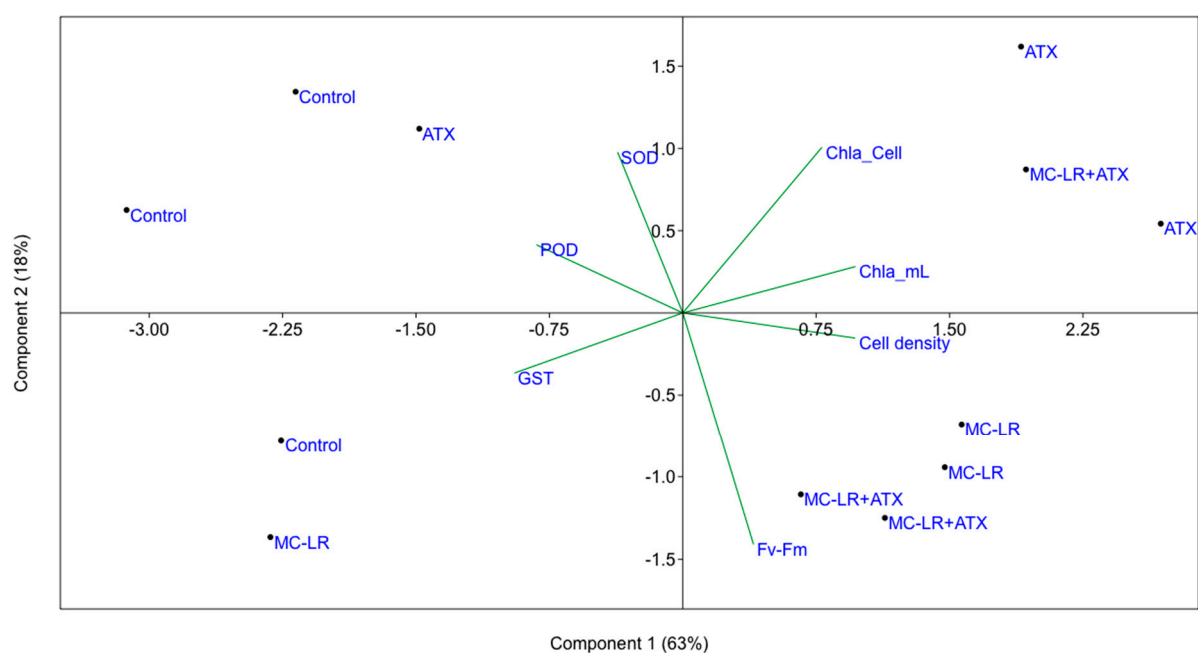

**Figure S3.** PCA biplot showing the relationship between the physiological responses of *Selenastrum capricornutum* to different anatoxin-a (ATX) and microcystin-LR (MC-LR) treatments. SOD = Superoxide dismutase activity, POD = peroxidase activity, GST = Glutathione S-transferase activity, Chla-Cell = Chlorophyll content per cell, Chla-mL = Chlorophyll content per mL, Fv/Fm = maximum quantum efficiency of photosystem II.

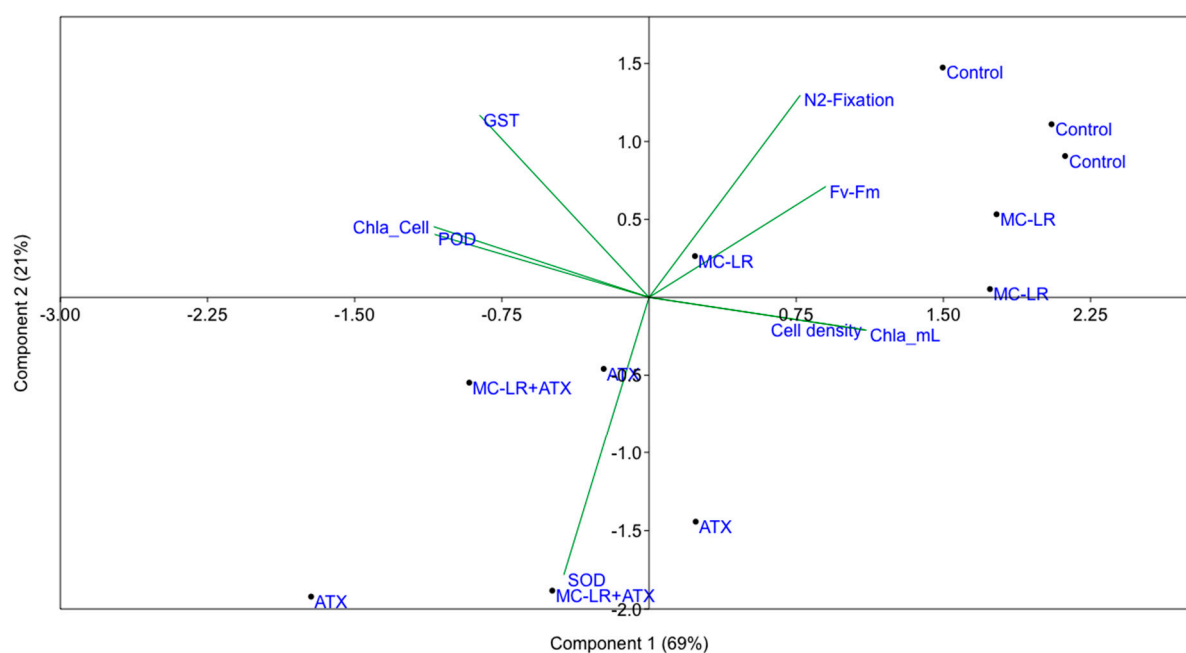

**Figure S4.** PCA biplot showing the relationship between the physiological responses of *Anabaena variabilis* UTEX B377 during exposure to different anatoxin-a (ATX) and microcystin-LR (MC-LR) treatments. SOD = Superoxide dismutase activity, POD = peroxidase activity, GST = Glutathione S-transferase activity, Chla-Cell = Chlorophyll content per cell, Chla-mL = Chlorophyll content per mL, Fv/Fm = maximum quantum efficiency of photosystem II.
